# Supplementary material
Source: publisher figshare collection journal article supplement (https://acs.figshare.com/ndownloader/files/4678747)
Supplement: Supplementary file 1 [file 4678747]

 
data_sin02 
 
_audit_creation_method            SHELXL-97 
_chemical_name_systematic 
; 
 ? 
; 
_chemical_name_common             ? 
_chemical_melting_point           ? 
_chemical_formula_moiety          ? 
_chemical_formula_sum 
 'C23 H17 F6 N8 O2 P Ru' 
_chemical_formula_weight          683.49 
 
loop_ 
 _atom_type_symbol 
 _atom_type_description 
 _atom_type_scat_dispersion_real 
 _atom_type_scat_dispersion_imag 
 _atom_type_scat_source 
 'C'  'C'   0.0033   0.0016 
 'International Tables Vol C Tables 4.2.6.8 and 6.1.1.4' 
 'H'  'H'   0.0000   0.0000 
 'International Tables Vol C Tables 4.2.6.8 and 6.1.1.4' 
 'N'  'N'   0.0061   0.0033 
 'International Tables Vol C Tables 4.2.6.8 and 6.1.1.4' 
 'O'  'O'   0.0106   0.0060 
 'International Tables Vol C Tables 4.2.6.8 and 6.1.1.4' 
 'F'  'F'   0.0171   0.0103 
 'International Tables Vol C Tables 4.2.6.8 and 6.1.1.4' 
 'P'  'P'   0.1023   0.0942 
 'International Tables Vol C Tables 4.2.6.8 and 6.1.1.4' 
 'Ru'  'Ru'  -1.2594   0.8363 
 'International Tables Vol C Tables 4.2.6.8 and 6.1.1.4' 
 
_symmetry_cell_setting            monoclinic 
_symmetry_space_group_name_H-M    P2(1)/n 
 
loop_ 
 _symmetry_equiv_pos_as_xyz 
 'x, y, z' 
 '-x+1/2, y+1/2, -z+1/2' 
 '-x, -y, -z' 
 'x-1/2, -y-1/2, z-1/2' 
 
_cell_length_a                    8.9165(17) 
_cell_length_b                    15.8829(19) 
_cell_length_c                    19.321(3) 
_cell_angle_alpha                 90.00 
_cell_angle_beta                  95.216(15) 
_cell_angle_gamma                 90.00 
_cell_volume                      2724.9(7) 
_cell_formula_units_Z             4 
_cell_measurement_temperature     173(2) 
_cell_measurement_reflns_used     48 
_cell_measurement_theta_min       5.1 
_cell_measurement_theta_max       11.5 
 
_exptl_crystal_description        needle 
_exptl_crystal_colour             red 
_exptl_crystal_size_max           0.65 
_exptl_crystal_size_mid           0.12 
_exptl_crystal_size_min           0.06 
_exptl_crystal_density_meas       ? 
_exptl_crystal_density_diffrn     1.666 
_exptl_crystal_density_method     'not measured' 
_exptl_crystal_F_000              1360 
_exptl_absorpt_coefficient_mu     0.713 
_exptl_absorpt_correction_type    psi-scan 
_exptl_absorpt_correction_T_min   0.6544 
_exptl_absorpt_correction_T_max   0.9585 
_exptl_absorpt_process_details    ? 
 
_exptl_special_details 
; 
 ? 
; 
 
_diffrn_ambient_temperature       173(2) 
_diffrn_radiation_wavelength      0.71073 
_diffrn_radiation_type            MoK\a 
_diffrn_radiation_source          'fine-focus sealed tube' 
_diffrn_radiation_monochromator   graphite 
_diffrn_measurement_device_type   Siemens P4 
_diffrn_measurement_method        ? 
_diffrn_detector_area_resol_mean  ? 
_diffrn_standards_number          2 
_diffrn_standards_interval_count  198 
_diffrn_standards_interval_time   ? 
_diffrn_standards_decay_%         0.1 
_diffrn_reflns_number             5651 
_diffrn_reflns_av_R_equivalents   0.0563 
_diffrn_reflns_av_sigmaI/netI     0.1401 
_diffrn_reflns_limit_h_min        0 
_diffrn_reflns_limit_h_max        10 
_diffrn_reflns_limit_k_min        0 
_diffrn_reflns_limit_k_max        19 
_diffrn_reflns_limit_l_min        -23 
_diffrn_reflns_limit_l_max        23 
_diffrn_reflns_theta_min          2.12 
_diffrn_reflns_theta_max          26.00 
_reflns_number_total              5303 
_reflns_number_gt                 2898 
_reflns_threshold_expression      >2sigma(I) 
 
_computing_data_collection        ? 
_computing_cell_refinement        ? 
_computing_data_reduction         ? 
_computing_structure_solution     'SHELXS-97 (Sheldrick, 1990)' 
_computing_structure_refinement   'SHELXL-97 (Sheldrick, 1997)' 
_computing_molecular_graphics     ? 
_computing_publication_material   ? 
 
_refine_special_details 
; 
 Refinement of F^2^ against ALL reflections.  The weighted R-factor wR and 
 goodness of fit S are based on F^2^, conventional R-factors R are based 
 on F, with F set to zero for negative F^2^. The threshold expression of 
 F^2^ > 2sigma(F^2^) is used only for calculating R-factors(gt) etc. and is 
 not relevant to the choice of reflections for refinement.  R-factors based 
 on F^2^ are statistically about twice as large as those based on F, and R- 
 factors based on ALL data will be even larger. 
; 
 
_refine_ls_structure_factor_coef  Fsqd  
_refine_ls_matrix_type            full 
_refine_ls_weighting_scheme       calc  
_refine_ls_weighting_details 
 'calc w=1/[\s^2^(Fo^2^)+(0.0593P)^2^] where P=(Fo^2^+2Fc^2^)/3' 
_atom_sites_solution_primary      direct 
_atom_sites_solution_secondary    difmap 
_atom_sites_solution_hydrogens    geom 
_refine_ls_hydrogen_treatment     refU 
_refine_ls_extinction_method      none 
_refine_ls_extinction_coef        ? 
_refine_ls_number_reflns          5303 
_refine_ls_number_parameters      371 
_refine_ls_number_restraints      0 
_refine_ls_R_factor_all           0.1053 
_refine_ls_R_factor_gt            0.0534 
_refine_ls_wR_factor_ref          0.1316 
_refine_ls_wR_factor_gt           0.1201 
_refine_ls_goodness_of_fit_ref    0.827 
_refine_ls_restrained_S_all       0.827 
_refine_ls_shift/su_max           0.001 
_refine_ls_shift/su_mean          0.000 
 
loop_ 
 _atom_site_label 
 _atom_site_type_symbol 
 _atom_site_fract_x 
 _atom_site_fract_y 
 _atom_site_fract_z 
 _atom_site_U_iso_or_equiv 
 _atom_site_adp_type 
 _atom_site_occupancy 
 _atom_site_symmetry_multiplicity 
 _atom_site_calc_flag 
 _atom_site_refinement_flags 
 _atom_site_disorder_assembly 
 _atom_site_disorder_group 
Ru Ru 1.38464(6) -0.21106(3) 1.09950(2) 0.02452(15) Uani 1 1 d . . . 
N1 N 1.2904(6) -0.1898(3) 1.0012(2) 0.0303(13) Uani 1 1 d . . . 
O1 O 1.2020(5) -0.1285(3) 0.9884(2) 0.0372(11) Uani 1 1 d . . . 
O2 O 1.3262(6) -0.2336(3) 0.9518(2) 0.0475(14) Uani 1 1 d . . . 
N2 N 1.4109(6) -0.0887(3) 1.1140(2) 0.0261(12) Uani 1 1 d . . . 
N3 N 1.1836(6) -0.1835(3) 1.1413(2) 0.0245(12) Uani 1 1 d . . . 
N4 N 1.5910(6) -0.1913(3) 1.0613(3) 0.0313(13) Uani 1 1 d . . . 
N5 N 1.4751(6) -0.2439(3) 1.1983(2) 0.0271(12) Uani 1 1 d . . . 
N6 N 1.3592(6) -0.3419(3) 1.0983(3) 0.0315(14) Uani 1 1 d . . . 
N7 N 1.4989(7) -0.3573(3) 1.2798(3) 0.0365(14) Uani 1 1 d . . . 
N8 N 1.3596(7) -0.4597(3) 1.1771(3) 0.0413(15) Uani 1 1 d . . . 
C1 C 1.2988(8) -0.0458(4) 1.1426(3) 0.0280(15) Uani 1 1 d . . . 
C2 C 1.3162(8) 0.0400(4) 1.1554(3) 0.0352(17) Uani 1 1 d . . . 
H2A H 1.2412 0.0707 1.1765 0.047(5) Uiso 1 1 calc R . . 
C3 C 1.4443(9) 0.0797(4) 1.1368(3) 0.0411(18) Uani 1 1 d . . . 
H3A H 1.4574 0.1383 1.1452 0.047(5) Uiso 1 1 calc R . . 
C4 C 1.5509(9) 0.0359(4) 1.1070(3) 0.0398(18) Uani 1 1 d . . . 
H4A H 1.6390 0.0635 1.0945 0.047(5) Uiso 1 1 calc R . . 
C5 C 1.5314(8) -0.0501(4) 1.0945(3) 0.0317(16) Uani 1 1 d . . . 
C6 C 1.1677(7) -0.1001(4) 1.1582(3) 0.0267(14) Uani 1 1 d . . . 
C7 C 1.0468(8) -0.0707(4) 1.1885(3) 0.0346(16) Uani 1 1 d . . . 
H7A H 1.0380 -0.0123 1.1979 0.047(5) Uiso 1 1 calc R . . 
C8 C 0.9371(9) -0.1256(5) 1.2057(4) 0.0448(19) Uani 1 1 d . . . 
H8A H 0.8537 -0.1065 1.2287 0.047(5) Uiso 1 1 calc R . . 
C9 C 0.9518(8) -0.2104(5) 1.1883(3) 0.0425(17) Uani 1 1 d . . . 
H9A H 0.8764 -0.2499 1.1979 0.047(5) Uiso 1 1 calc R . . 
C10 C 1.0770(8) -0.2363(4) 1.1569(3) 0.0325(16) Uani 1 1 d . . . 
H10A H 1.0871 -0.2943 1.1462 0.047(5) Uiso 1 1 calc R . . 
C11 C 1.6360(8) -0.1083(4) 1.0622(3) 0.0370(17) Uani 1 1 d . . . 
C12 C 1.7674(8) -0.0823(5) 1.0340(4) 0.046(2) Uani 1 1 d . . . 
H12A H 1.7956 -0.0246 1.0346 0.047(5) Uiso 1 1 calc R . . 
C13 C 1.8552(9) -0.1421(6) 1.0053(4) 0.057(2) Uani 1 1 d . . . 
H13A H 1.9444 -0.1254 0.9856 0.047(5) Uiso 1 1 calc R . . 
C14 C 1.8140(8) -0.2266(5) 1.0049(4) 0.048(2) Uani 1 1 d . . . 
H14A H 1.8749 -0.2682 0.9858 0.047(5) Uiso 1 1 calc R . . 
C15 C 1.6818(8) -0.2486(5) 1.0330(3) 0.0406(18) Uani 1 1 d . . . 
H15A H 1.6531 -0.3062 1.0325 0.047(5) Uiso 1 1 calc R . . 
C16 C 1.4570(7) -0.3254(4) 1.2171(3) 0.0274(15) Uani 1 1 d . . . 
C17 C 1.5478(8) -0.1930(4) 1.2473(3) 0.0334(16) Uani 1 1 d . . . 
H17A H 1.5648 -0.1356 1.2364 0.047(5) Uiso 1 1 calc R . . 
C18 C 1.5970(8) -0.2232(4) 1.3122(3) 0.0360(16) Uani 1 1 d . . . 
H18A H 1.6478 -0.1877 1.3463 0.047(5) Uiso 1 1 calc R . . 
C19 C 1.5698(7) -0.3070(4) 1.3259(3) 0.0328(16) Uani 1 1 d . . . 
H19A H 1.6037 -0.3291 1.3703 0.047(5) Uiso 1 1 calc R . . 
C20 C 1.3881(8) -0.3798(4) 1.1613(3) 0.0297(15) Uani 1 1 d . . . 
C21 C 1.3022(8) -0.3927(4) 1.0461(3) 0.0387(17) Uani 1 1 d . . . 
H21A H 1.2833 -0.3703 1.0006 0.047(5) Uiso 1 1 calc R . . 
C22 C 1.2713(10) -0.4756(4) 1.0573(4) 0.053(2) Uani 1 1 d . . . 
H22A H 1.2309 -0.5108 1.0205 0.047(5) Uiso 1 1 calc R . . 
C23 C 1.3005(11) -0.5064(5) 1.1236(4) 0.059(2) Uani 1 1 d . . . 
H23A H 1.2776 -0.5638 1.1320 0.047(5) Uiso 1 1 calc R . . 
P P 1.8392(3) -0.46298(12) 1.14866(11) 0.0474(5) Uani 1 1 d . . . 
F1 F 1.8888(6) -0.4100(3) 1.0846(2) 0.0755(15) Uani 1 1 d . . . 
F2 F 1.7528(6) -0.3854(3) 1.1746(3) 0.0884(18) Uani 1 1 d . . . 
F3 F 1.6895(7) -0.4890(5) 1.1055(3) 0.136(3) Uani 1 1 d . . . 
F4 F 1.7932(7) -0.5148(3) 1.2130(3) 0.106(2) Uani 1 1 d . . . 
F5 F 1.9174(9) -0.5405(3) 1.1181(4) 0.146(3) Uani 1 1 d . . . 
F6 F 1.9889(6) -0.4331(5) 1.1888(3) 0.107(2) Uani 1 1 d . . . 
 
loop_ 
 _atom_site_aniso_label 
 _atom_site_aniso_U_11 
 _atom_site_aniso_U_22 
 _atom_site_aniso_U_33 
 _atom_site_aniso_U_23 
 _atom_site_aniso_U_13 
 _atom_site_aniso_U_12 
Ru 0.0365(3) 0.0206(2) 0.0159(2) 0.0024(2) -0.00141(17) -0.0003(3) 
N1 0.044(4) 0.029(3) 0.018(3) 0.005(2) 0.000(2) -0.002(3) 
O1 0.043(3) 0.034(3) 0.034(3) 0.007(2) 0.000(2) 0.004(2) 
O2 0.076(4) 0.046(3) 0.020(2) -0.003(2) -0.002(2) 0.009(3) 
N2 0.033(3) 0.026(3) 0.018(3) 0.004(2) -0.006(2) -0.008(3) 
N3 0.028(3) 0.025(3) 0.019(2) -0.001(2) -0.006(2) 0.000(2) 
N4 0.032(3) 0.035(3) 0.026(3) 0.008(2) -0.001(2) 0.000(3) 
N5 0.039(3) 0.027(3) 0.015(2) 0.002(2) -0.002(2) -0.001(3) 
N6 0.054(4) 0.022(3) 0.018(3) -0.002(2) 0.003(3) -0.007(3) 
N7 0.053(4) 0.030(3) 0.025(3) 0.007(2) -0.007(3) -0.008(3) 
N8 0.061(4) 0.030(3) 0.031(3) 0.002(2) -0.010(3) -0.010(3) 
C1 0.039(4) 0.025(3) 0.019(3) 0.003(3) -0.005(3) 0.003(3) 
C2 0.055(5) 0.025(3) 0.025(3) -0.004(3) 0.001(3) -0.004(3) 
C3 0.060(5) 0.025(4) 0.036(4) 0.005(3) -0.009(4) -0.007(4) 
C4 0.048(5) 0.037(4) 0.034(4) 0.010(3) -0.001(3) -0.012(4) 
C5 0.041(4) 0.031(3) 0.021(3) 0.007(3) -0.011(3) -0.006(3) 
C6 0.036(4) 0.021(3) 0.021(3) -0.003(2) -0.006(3) -0.001(3) 
C7 0.042(4) 0.028(4) 0.033(4) -0.011(3) -0.002(3) 0.001(3) 
C8 0.042(5) 0.046(5) 0.047(5) -0.012(4) 0.011(4) -0.002(4) 
C9 0.038(4) 0.043(4) 0.048(4) 0.000(4) 0.009(3) -0.012(4) 
C10 0.041(4) 0.026(4) 0.030(3) 0.002(3) 0.003(3) -0.007(3) 
C11 0.042(4) 0.041(4) 0.026(3) 0.008(3) -0.007(3) -0.011(4) 
C12 0.037(5) 0.052(5) 0.048(4) 0.018(4) 0.000(4) -0.010(4) 
C13 0.026(4) 0.092(7) 0.053(5) 0.028(5) 0.010(4) 0.000(5) 
C14 0.034(4) 0.061(6) 0.052(4) 0.002(4) 0.010(4) 0.020(4) 
C15 0.046(5) 0.046(4) 0.031(4) 0.012(3) 0.008(3) 0.009(4) 
C16 0.037(4) 0.027(3) 0.017(3) 0.004(2) -0.005(3) -0.004(3) 
C17 0.048(4) 0.024(4) 0.027(3) 0.000(3) -0.004(3) -0.007(3) 
C18 0.050(4) 0.029(4) 0.026(3) -0.001(3) -0.015(3) -0.006(3) 
C19 0.041(4) 0.035(4) 0.020(3) 0.006(3) -0.010(3) -0.005(3) 
C20 0.041(4) 0.023(3) 0.024(3) 0.003(3) -0.003(3) -0.005(3) 
C21 0.063(5) 0.030(4) 0.021(3) -0.004(3) -0.006(3) -0.007(4) 
C22 0.089(7) 0.032(4) 0.036(4) -0.018(3) -0.009(4) -0.010(4) 
C23 0.101(7) 0.025(4) 0.049(5) 0.001(4) -0.004(5) -0.010(5) 
P 0.0605(15) 0.0329(10) 0.0500(12) 0.0034(9) 0.0117(11) -0.0049(10) 
F1 0.113(4) 0.065(3) 0.052(3) 0.006(2) 0.024(3) -0.013(3) 
F2 0.111(5) 0.057(3) 0.105(4) 0.005(3) 0.048(4) 0.015(3) 
F3 0.091(5) 0.213(8) 0.105(5) -0.054(5) 0.017(4) -0.073(5) 
F4 0.134(5) 0.069(4) 0.123(5) 0.055(4) 0.059(4) 0.018(4) 
F5 0.205(8) 0.032(3) 0.222(8) 0.015(4) 0.142(7) 0.016(4) 
F6 0.078(4) 0.170(7) 0.069(4) 0.025(4) -0.013(3) -0.024(4) 
 
_geom_special_details 
; 
 All esds (except the esd in the dihedral angle between two l.s. planes) 
 are estimated using the full covariance matrix.  The cell esds are taken 
 into account individually in the estimation of esds in distances, angles 
 and torsion angles; correlations between esds in cell parameters are only 
 used when they are defined by crystal symmetry.  An approximate (isotropic) 
 treatment of cell esds is used for estimating esds involving l.s. planes. 
; 
 
loop_ 
 _geom_bond_atom_site_label_1 
 _geom_bond_atom_site_label_2 
 _geom_bond_distance 
 _geom_bond_site_symmetry_2 
 _geom_bond_publ_flag 
Ru N2 1.975(5) . ? 
Ru N1 2.034(5) . ? 
Ru N4 2.068(5) . ? 
Ru N5 2.070(5) . ? 
Ru N3 2.079(5) . ? 
Ru N6 2.090(5) . ? 
N1 O2 1.246(6) . ? 
N1 O1 1.264(6) . ? 
N2 C5 1.321(8) . ? 
N2 C1 1.366(8) . ? 
N3 C10 1.322(8) . ? 
N3 C6 1.375(7) . ? 
N4 C15 1.365(8) . ? 
N4 C11 1.378(8) . ? 
N5 C16 1.359(7) . ? 
N5 C17 1.364(7) . ? 
N6 C21 1.354(7) . ? 
N6 C20 1.362(7) . ? 
N7 C19 1.314(8) . ? 
N7 C16 1.334(7) . ? 
N8 C20 1.336(7) . ? 
N8 C23 1.341(9) . ? 
C1 C2 1.391(8) . ? 
C1 C6 1.504(9) . ? 
C2 C3 1.380(9) . ? 
C3 C4 1.349(10) . ? 
C4 C5 1.395(9) . ? 
C5 C11 1.489(9) . ? 
C6 C7 1.356(9) . ? 
C7 C8 1.372(9) . ? 
C8 C9 1.397(10) . ? 
C9 C10 1.380(9) . ? 
C11 C12 1.399(9) . ? 
C12 C13 1.379(11) . ? 
C13 C14 1.392(11) . ? 
C14 C15 1.387(10) . ? 
C16 C20 1.471(8) . ? 
C17 C18 1.376(8) . ? 
C18 C19 1.383(8) . ? 
C21 C22 1.366(9) . ? 
C22 C23 1.374(10) . ? 
P F6 1.555(6) . ? 
P F5 1.557(6) . ? 
P F2 1.561(5) . ? 
P F3 1.564(6) . ? 
P F4 1.575(5) . ? 
P F1 1.592(5) . ? 
 
loop_ 
 _geom_angle_atom_site_label_1 
 _geom_angle_atom_site_label_2 
 _geom_angle_atom_site_label_3 
 _geom_angle 
 _geom_angle_site_symmetry_1 
 _geom_angle_site_symmetry_3 
 _geom_angle_publ_flag 
N2 Ru N1 90.18(19) . . ? 
N2 Ru N4 78.7(2) . . ? 
N1 Ru N4 87.0(2) . . ? 
N2 Ru N5 94.93(19) . . ? 
N1 Ru N5 174.8(2) . . ? 
N4 Ru N5 94.7(2) . . ? 
N2 Ru N3 80.4(2) . . ? 
N1 Ru N3 91.8(2) . . ? 
N4 Ru N3 159.01(19) . . ? 
N5 Ru N3 88.41(19) . . ? 
N2 Ru N6 172.50(19) . . ? 
N1 Ru N6 96.8(2) . . ? 
N4 Ru N6 104.2(2) . . ? 
N5 Ru N6 78.0(2) . . ? 
N3 Ru N6 96.7(2) . . ? 
O2 N1 O1 118.6(5) . . ? 
O2 N1 Ru 120.7(4) . . ? 
O1 N1 Ru 120.6(4) . . ? 
C5 N2 C1 121.9(5) . . ? 
C5 N2 Ru 120.3(5) . . ? 
C1 N2 Ru 117.8(4) . . ? 
C10 N3 C6 117.7(6) . . ? 
C10 N3 Ru 128.2(4) . . ? 
C6 N3 Ru 114.0(4) . . ? 
C15 N4 C11 117.5(6) . . ? 
C15 N4 Ru 128.4(5) . . ? 
C11 N4 Ru 114.1(5) . . ? 
C16 N5 C17 116.1(5) . . ? 
C16 N5 Ru 116.2(4) . . ? 
C17 N5 Ru 127.7(4) . . ? 
C21 N6 C20 115.4(5) . . ? 
C21 N6 Ru 129.4(4) . . ? 
C20 N6 Ru 114.7(4) . . ? 
C19 N7 C16 117.5(5) . . ? 
C20 N8 C23 114.7(6) . . ? 
N2 C1 C2 119.0(6) . . ? 
N2 C1 C6 113.9(5) . . ? 
C2 C1 C6 127.0(6) . . ? 
C3 C2 C1 118.9(7) . . ? 
C4 C3 C2 120.5(6) . . ? 
C3 C4 C5 119.8(7) . . ? 
N2 C5 C4 119.7(7) . . ? 
N2 C5 C11 112.9(6) . . ? 
C4 C5 C11 127.4(7) . . ? 
C7 C6 N3 122.5(6) . . ? 
C7 C6 C1 123.5(6) . . ? 
N3 C6 C1 114.0(6) . . ? 
C6 C7 C8 119.9(6) . . ? 
C7 C8 C9 118.0(7) . . ? 
C10 C9 C8 119.3(7) . . ? 
N3 C10 C9 122.6(6) . . ? 
N4 C11 C12 122.0(7) . . ? 
N4 C11 C5 114.0(6) . . ? 
C12 C11 C5 123.9(7) . . ? 
C13 C12 C11 118.7(7) . . ? 
C12 C13 C14 120.5(7) . . ? 
C15 C14 C13 118.3(7) . . ? 
N4 C15 C14 123.0(7) . . ? 
N7 C16 N5 125.1(6) . . ? 
N7 C16 C20 120.5(6) . . ? 
N5 C16 C20 114.4(5) . . ? 
N5 C17 C18 121.2(6) . . ? 
C17 C18 C19 117.6(6) . . ? 
N7 C19 C18 122.5(6) . . ? 
N8 C20 N6 126.9(6) . . ? 
N8 C20 C16 117.7(5) . . ? 
N6 C20 C16 115.4(5) . . ? 
N6 C21 C22 121.6(6) . . ? 
C21 C22 C23 117.9(6) . . ? 
N8 C23 C22 123.3(7) . . ? 
F6 P F5 92.1(4) . . ? 
F6 P F2 91.4(4) . . ? 
F5 P F2 176.0(4) . . ? 
F6 P F3 176.9(4) . . ? 
F5 P F3 88.8(5) . . ? 
F2 P F3 87.6(4) . . ? 
F6 P F4 92.3(4) . . ? 
F5 P F4 92.5(3) . . ? 
F2 P F4 89.3(3) . . ? 
F3 P F4 90.7(4) . . ? 
F6 P F1 86.6(3) . . ? 
F5 P F1 87.6(3) . . ? 
F2 P F1 90.7(3) . . ? 
F3 P F1 90.5(4) . . ? 
F4 P F1 178.8(4) . . ? 
 
_diffrn_measured_fraction_theta_max    0.993 
_diffrn_reflns_theta_full              26.00 
_diffrn_measured_fraction_theta_full   0.993 
_refine_diff_density_max    0.979 
_refine_diff_density_min   -1.167 
_refine_diff_density_rms    0.116 
